# Supplementary material for: Identification the Pathogen Cause a New Apple Leaf Blight in China and Determination the Controlling Efficacy for Five Botanical Fungicides
Source: MDPI journal article supplement (doi:10.3390/jof10040255), 2024-03-27
Supplement: s1 [file s1]

**Table S1.** Reference sequences, species, sources, and GenBank accession numbers used for phylogenetic analysis in the study.

| Species                           | Strain            | Locality, host/substrate              | GenBank accession |                 |                 |
|-----------------------------------|-------------------|---------------------------------------|-------------------|-----------------|-----------------|
|                                   |                   |                                       | <i>Alt a-1</i>    | <i>endoPG</i>   | OPA10-2         |
| <i>Alternaria alternata</i>       | 19-51-31          | Italy, <i>Clematis japonica</i>       | MT043357          | MT185590        | MT043355        |
| <i>Alternaria alternata</i>       | CBS 686.68        | Sahara, desert sand                   | KP123859          | KP124006        | KP124614        |
| <i>Alternaria alternata</i>       | CBS 107.53        | Japan, <i>Pyrus pyrifolia</i>         | KP123858          | KP124005        | KP124613        |
| <i>Alternaria alstroemeriae</i>   | <u>EGS 50.116</u> | USA, <i>Alstroemeria</i> sp.          | MN975274          | MN975303        | MN975323        |
| <i>Alternaria arborescens</i>     | <u>EGS 39.128</u> | USA, <i>Solanum lycopersicum</i>      | MN975269          | MN975299        | MN975318        |
| <i>Alternaria gaisen</i>          | <u>EGS 90.512</u> | Japan, <i>Pyrus pyrifolia</i>         | MN975272          | MN975301        | MN975320        |
| <i>Alternaria tenuissima</i>      | SY-4*             | China, <i>Dioscorea zingiberensis</i> | MK593137          | MK593136        | EF503979        |
| <i>Alternaria tenuissima</i>      | DES512*           | USA, Desert soil                      | JQ282240          | EF504117        | EF503988        |
| <i>Alternaria longipes</i>        | EGS 30.033        | USA, <i>Nicotiana tabacum</i>         | MN975273          | MN975302        | MN975321        |
| <i>Alternaria longipes</i>        | CBS 539.94        | USA, <i>Nicotiana tabacum</i>         | KP123987          | KP124146        | KP124757        |
| <i>Alternaria longipes</i>        | CBS 917.96        | USA, <i>Nicotiana tabacum</i>         | KP123988          | KP124148        | KP124759        |
| <i>Alternaria jacinthicola</i>    | CBS 878.95        | Mauritius, <i>Arachis hypogaea</i>    | KP123983          | KP124142        | KP124753        |
| <i>Alternaria toxicogenica</i>    | PR320             | USA, <i>Citrus reticulata</i>         | JQ646411          | AY295027        | EF504057        |
| <i>Alternaria arborescens</i>     | CPC 25266         | Austria, <i>Pyrus</i> sp.             | KP123965          | KP124122        | KP124732        |
| <i>Alternaria burnsii</i>         | CBS 107.38        | India, <i>Cuminum cyminum</i>         | KP123967          | KP124124        | KP124734        |
| <i>Alternaria burnsii</i>         | CBS 118817        | India, <i>Tinospora cordifolia</i>    | KP123971          | KP124128        | KP124738        |
| <i>Alternaria eichhorniae</i>     | CBS 489.92        | India, <i>Eichhornia crassipes</i>    | KP123973          | KP124130        | KP124740        |
| <i>Alternaria gossypina</i>       | CBS 104.32        | Zimbabwe, <i>Gossypium</i> sp.        | JQ646395          | KP124135        | KP124746        |
| <i>Alternaria gossypina</i>       | CBS 102601        | Colombia, <i>Minneola tangelo</i>     | KP123979          | KP124138        | KP124749        |
| <i>Alternaria iridialustralis</i> | CBS 118486        | Australia, <i>Iris</i> sp.            | KP123981          | KP124140        | KP124751        |
| <i>Alternaria tomato</i>          | CBS 103.30        | Unknown, <i>Solanum lycopersicum</i>  | KP123991          | KP124151        | KP124762        |
|                                   | <b>ABL2</b>       | <b>China, <i>Malus pumila</i></b>     | <b>MZ222271</b>   | <b>MZ222269</b> | <b>MZ222272</b> |

Isolate obtained in this study were marked in bold. The accession number of another fungal strain from GenBank were marked\*.
